# Supplementary material for: Facile preparation of a novel chitosan-derived porous graphitized carbon biomaterial for highly efficient capture of N-glycans
Source: Royal Society of Chemistry journal article supplement (doi:10.1039/d2an01342h), 2022-01-01
Supplement: d2an01342h1.pdf [file d2an01342h1.pdf]

1 Supplementary Information for

2 **Facile preparation of the novel chitosan-derived porous**  
3 **graphitized carbon for highly efficient capture of N-glycans**

4

5 Jiaxi Wang,<sup>a</sup> Lingxiao Weng,<sup>a</sup> Weizhuo Liu,<sup>c</sup> Hongbin Zhang,<sup>b,\*</sup> Mingxia Gao,<sup>a</sup>

6 Xiangmin Zhang,<sup>a,\*</sup> and Li-Hao Huang,<sup>a,\*</sup>

7

8 <sup>a</sup> Shanghai Key Laboratory of Metabolic Remodeling and Health, Department of  
9 Chemistry and Institute of Metabolism and Integrative Biology, Fudan University,  
10 Shanghai 200032, China.

11 <sup>b</sup>Institute for Preservation of Chinese Ancient Books, Fudan University Library, Fudan  
12 University, Shanghai 200433, China.

13 <sup>c</sup> Department of Critical Care Medicine, Shanghai Chest Hospital, Shanghai Jiaotong  
14 University, 241 West Huaihai Road, Shanghai 200030, China.

15

## 16 **EXPERIMENTAL SECTION**

17 **Measurements and characterization.** X-ray photoelectron spectroscopy (XPS) for the  
18 valences analysis of elements was recorded on an AXIS ULTRA DLD XPS System  
19 with MONO Al source (Shimadzu Corp). The temperature-programmed desorption was  
20 performed by using the AutoChem 2920 analyzer (Micromeritics), and the evolved  
21 gases (CO, CO<sub>2</sub> and H<sub>2</sub>O) were identified by a quadrupole mass spectrometer (Pfeiffer,  
22 Omnistar320). The sample was heated to 110 °C under 50 ml/min helium flow for  
23 drying and degassing, then the sample was continuously heated to 1050 °C at a rate of  
24 10 °C/min under 50 ml/min helium flow and was maintained at 1050 °C for 1h. The  
25 static contact angles were measured using an OCA15+ contact-angle system  
26 (Dataphysics, Germany) at ambient temperature.

27 **Preparation of the human serum digest.** The human serum samples (obesity,  
28 impaired glucose tolerance, diabetes patients and healthy control) were centrifuged  
29 with the speed of 12000×g at 4 °C for 10 min. After being measured the concentration  
30 by bicinchoninic acid (BCA) protein assay kit, the obtained proteins were diluted with  
31 25 mM NH<sub>4</sub>HCO<sub>3</sub> and boiled for 5 min. Afterwards, the proteins were reduced with 10  
32 mM DTT for 30 min at 55 °C, and subsequently alkylated by 20 mM IAA for 60 min  
33 at 37 °C in the dark. The mixture was diluted and transferred to an ultrafiltration tube  
34 (3 kDa). After centrifugation, the denatured protein solution was collected. The PNGase  
35 F (1 μL) was added into the solution at 37 °C overnight. The released N-glycans were  
36 collected and preserved at -20 °C for further use.

37

39 **Fig. S1.** (a, b) SEM images, (c, d) TEM images (inset of Fig. 1d: SAED pattern), (e)

40 HAADF-STEM image and related elemental mapping images of the CS-900.

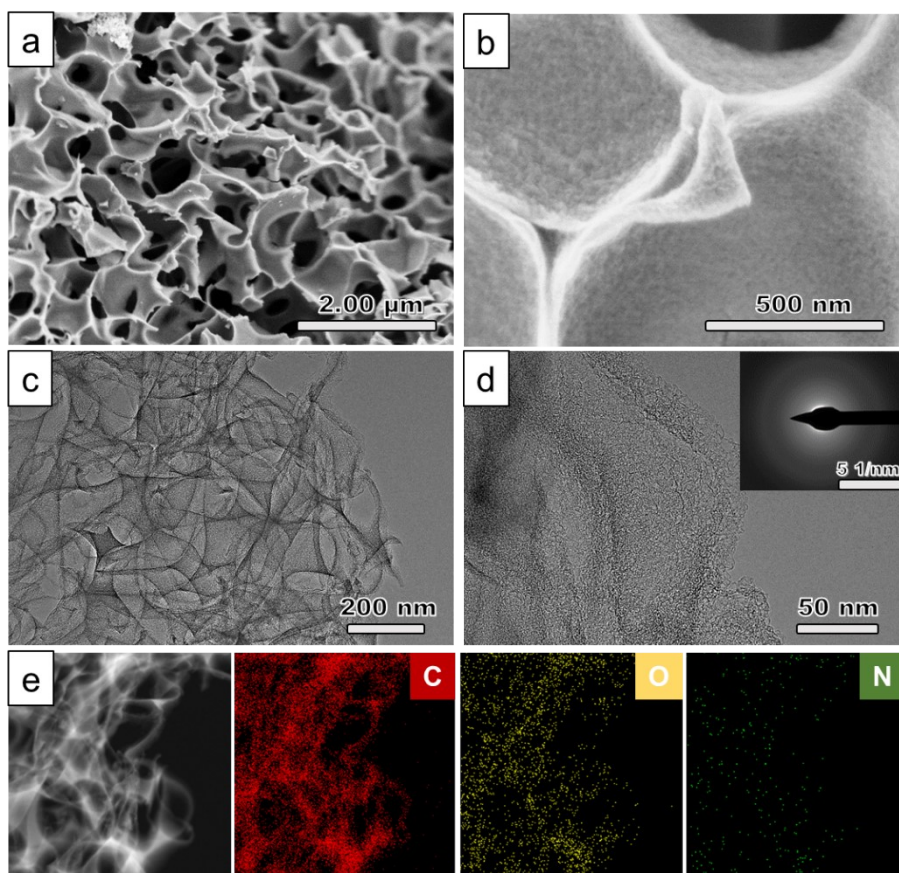

41  
42

43 **Fig. S2.** (a) CS-900 and (b) CS-900-1C materials dispersed in loading buffer solution.

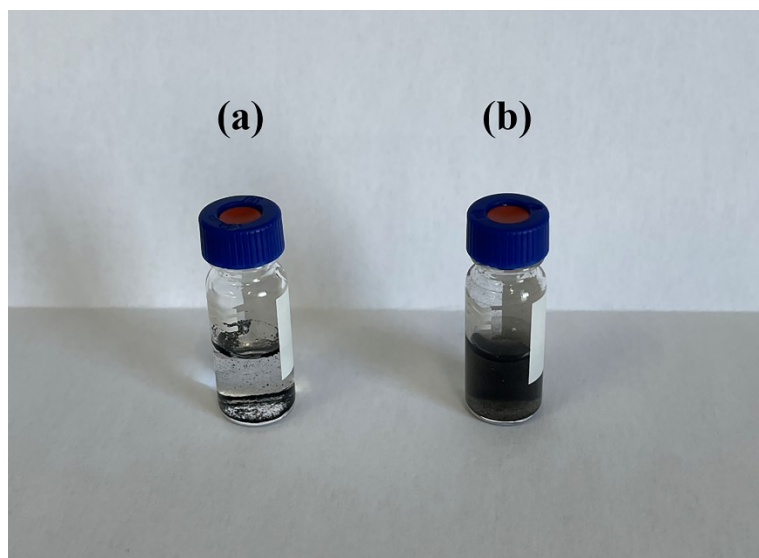

44

45

46

47

48 **Fig. S3.** The effect of different incubation time (a) 5 min; (b) 15 min; (c) 30 min and  
49 (d) 45 min in N-glycans enriched from OVA through three parallel tests.

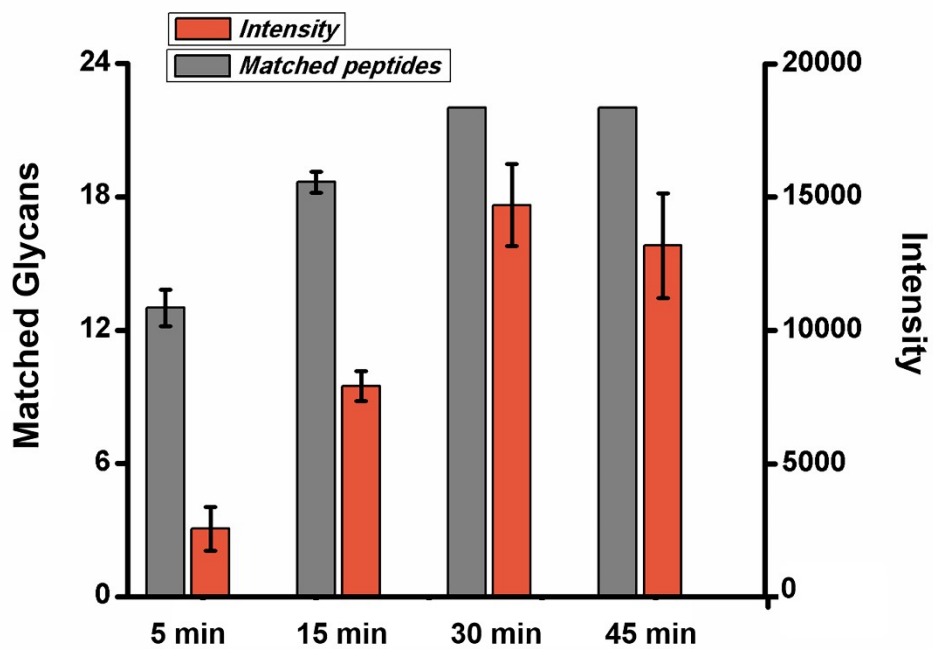

50

51 **Fig. S4.** MALDI-TOF-MS analysis of N-glycans derived from OVA enriched by CS-  
52 900-1C with different eluent (a) 10% ACN; (b) 30% ACN; (c) 50% ACN and (d) 80%  
53 ACN.

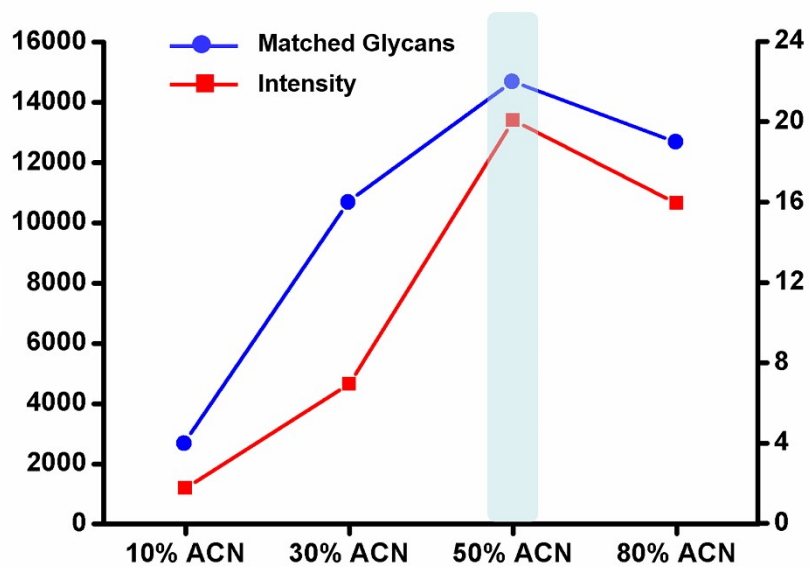

54

55

56 **Fig. S5.** MALDI-TOF mass spectra of N-glycans released from OVA digests after  
57 enrichment by (a) CS-900-1C, (b) CS-800-1C, (c) CS-700-1C and (d) CS-600-1C. The  
58 peaks of N-glycans are marked with “\*”.

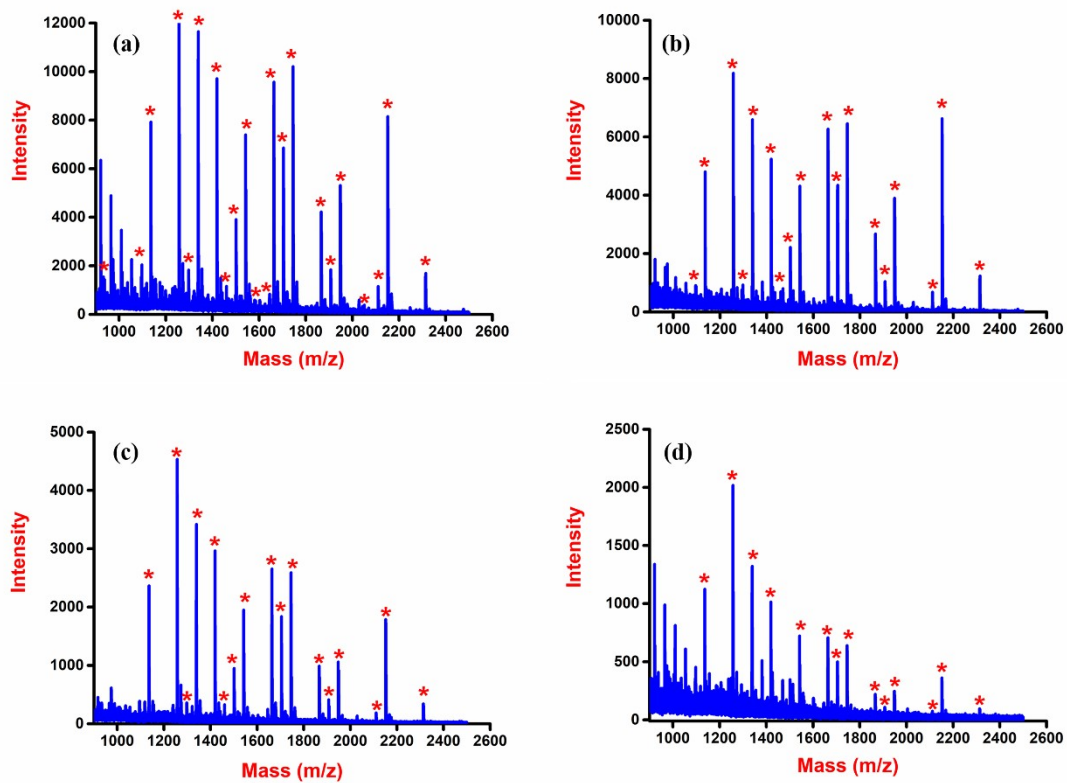

59

60

61 **Fig. S6.** The cycling performance of CS-900-1C for N-glycans capture (a). MALDI-  
62 TOF-MS for the N-glycans derived from OVA digest (50 ng/ $\mu$ L): (b) after treatment  
63 with CS-900-1C used for the first time, (c) after enrichment with CS-900-1C recycled  
64 8 times.

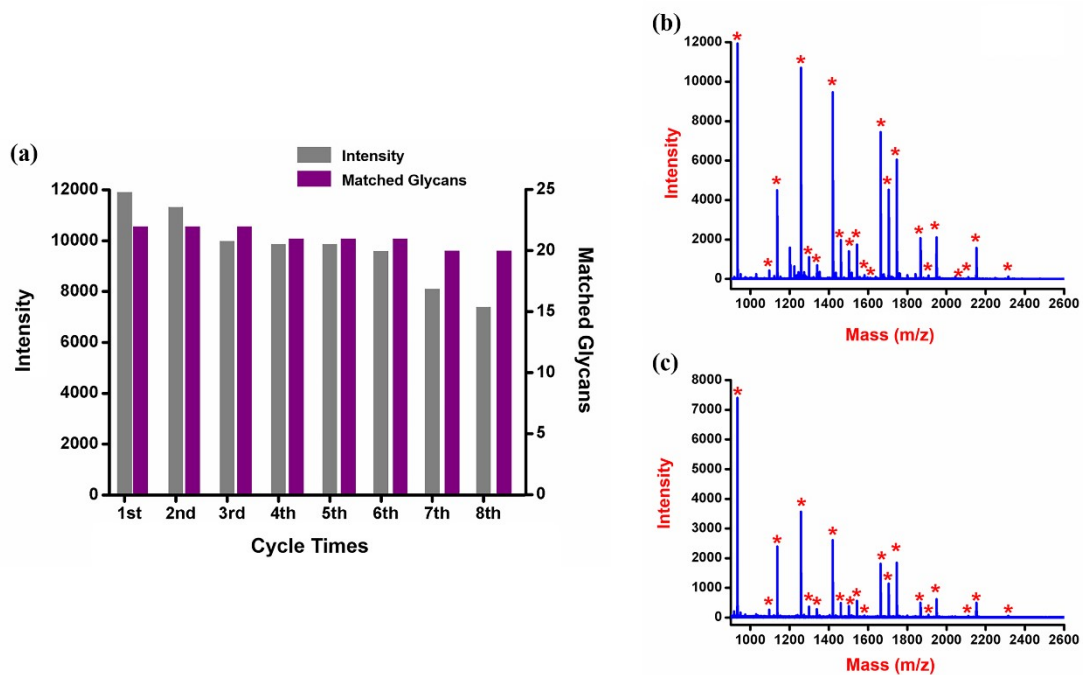

65  
66



67 **Fig. S7.** MALDI-TOF-MS for the N-glycans derived from OVA digest: (a) after  
68 treatment with the CS-900-1C biomaterials for the first time and (b) after enrichment  
69 with the CS-900-1C biomaterials which had been placed for six months.

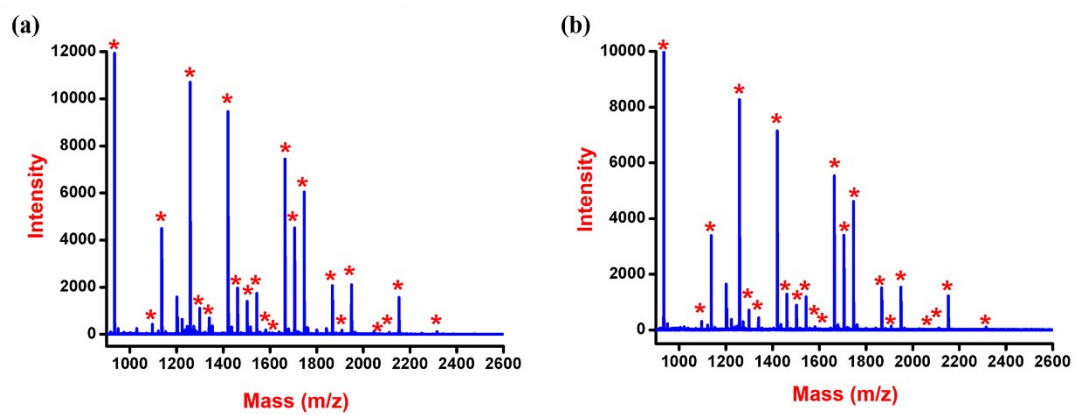

70

71

72 **Fig. S8.** MALDI-TOF-MS analysis of the N-glycans derived from the mixture of OVA  
73 digests, glycosylated proteins (OVA), and nonglycosylated proteins (BSA) (at mass  
74 ratio of 1:800:800). Supernate before enrichment (a) in positive mode and (b) in linear  
75 mode and eluate after enrichment by CS-900-1C biomaterials (c) in positive mode and  
76 (d) in linear mode. The peaks marked with red asterisks represent the identified N-  
77 glycans. The peaks marked with green asterisks represent the interferential proteins.

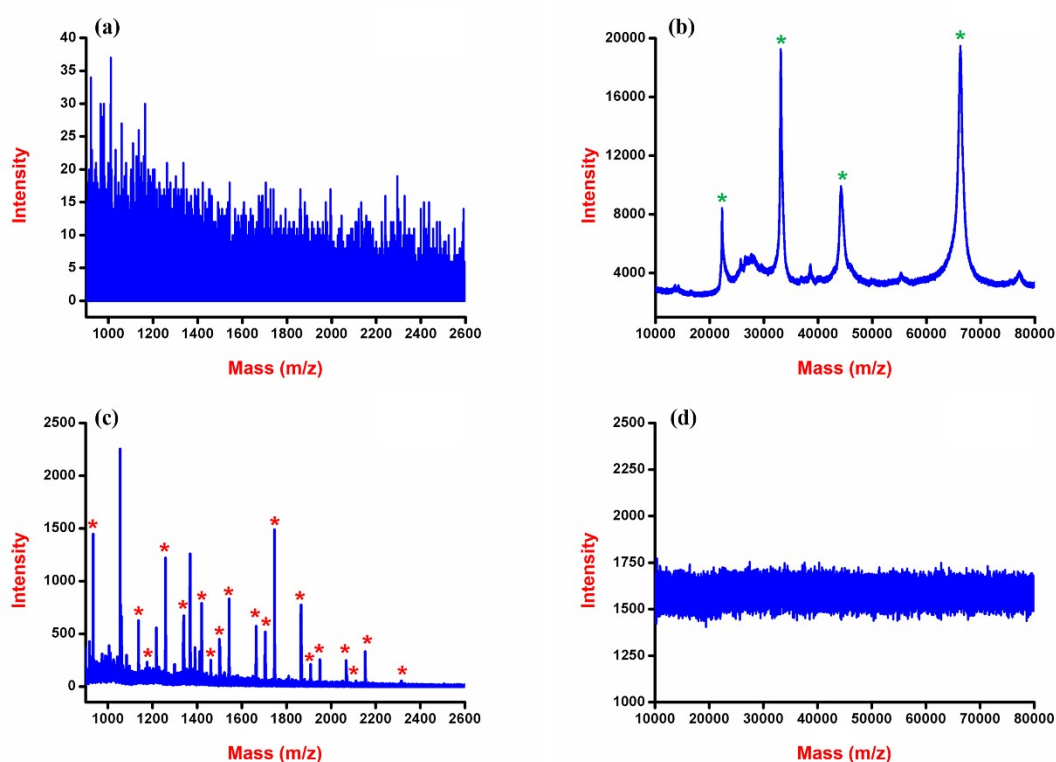

78  
79

80 **Fig. S9.** MALDI-TOF-MS analysis of N-glycans identified from normal human serum

81 (a) without enrichment and (b) after enrichment with CS-900-1C biomaterials.

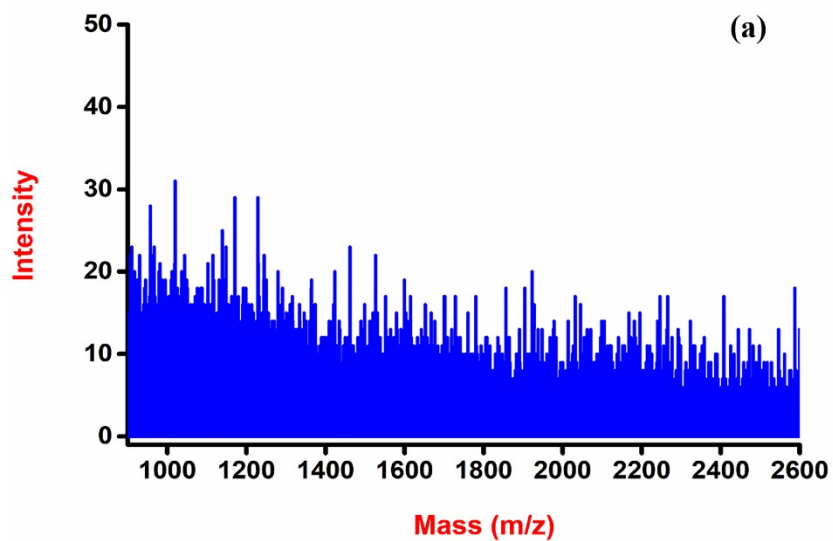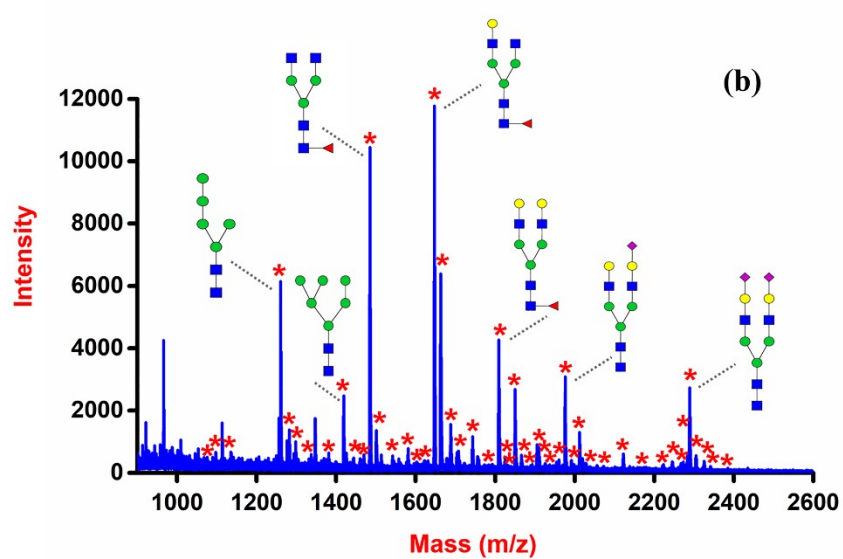

82

83

84

85

86

87

88

89 **Fig. S10.** Heatmap analysis based on 49 serum N-glycans in healthy controls (N),  
90 obesity (OB), impaired glucose tolerance (IGT) and diabetes (DM) groups.

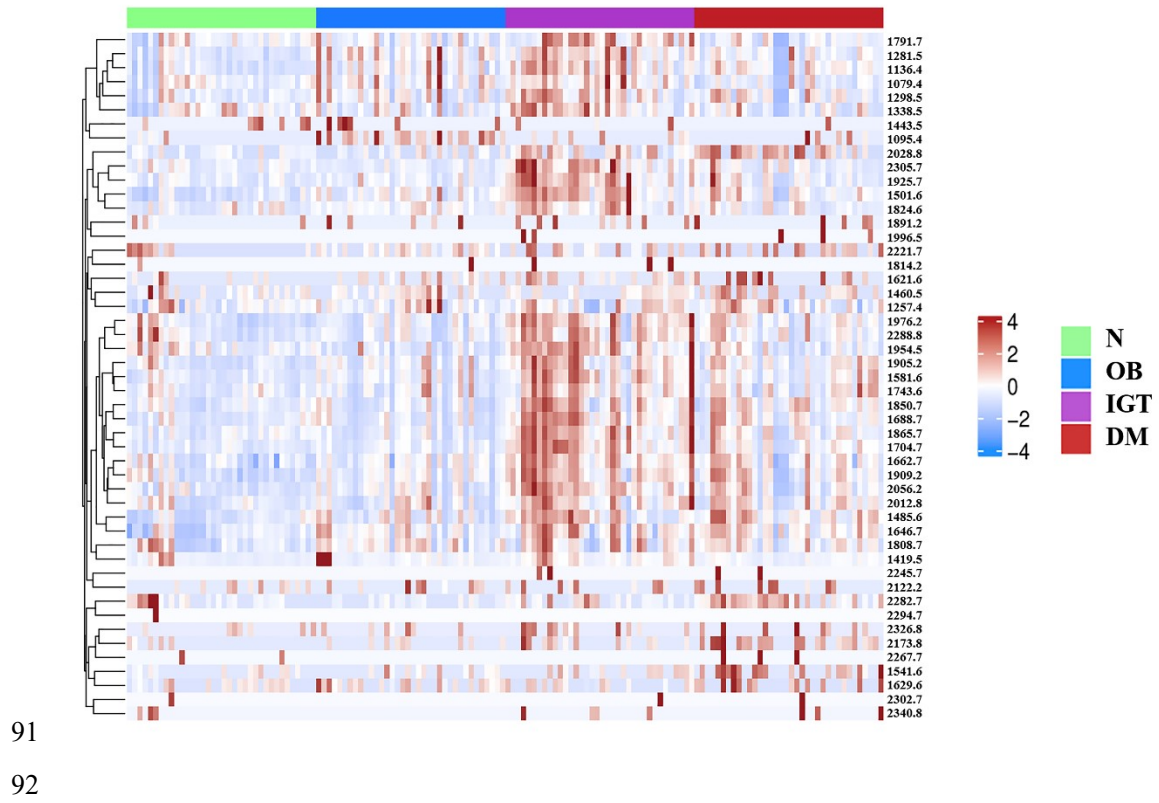

93 **Fig. S11.** Heatmap analysis based on selected 11 serum N-glycans with P value < 0.05  
 94 and VIP > 1 (a). The receiver operating characteristic (ROC) curve of sparse learning  
 95 to differentiate OB patients from IGT patients afforded diagnostic performance (b-e).

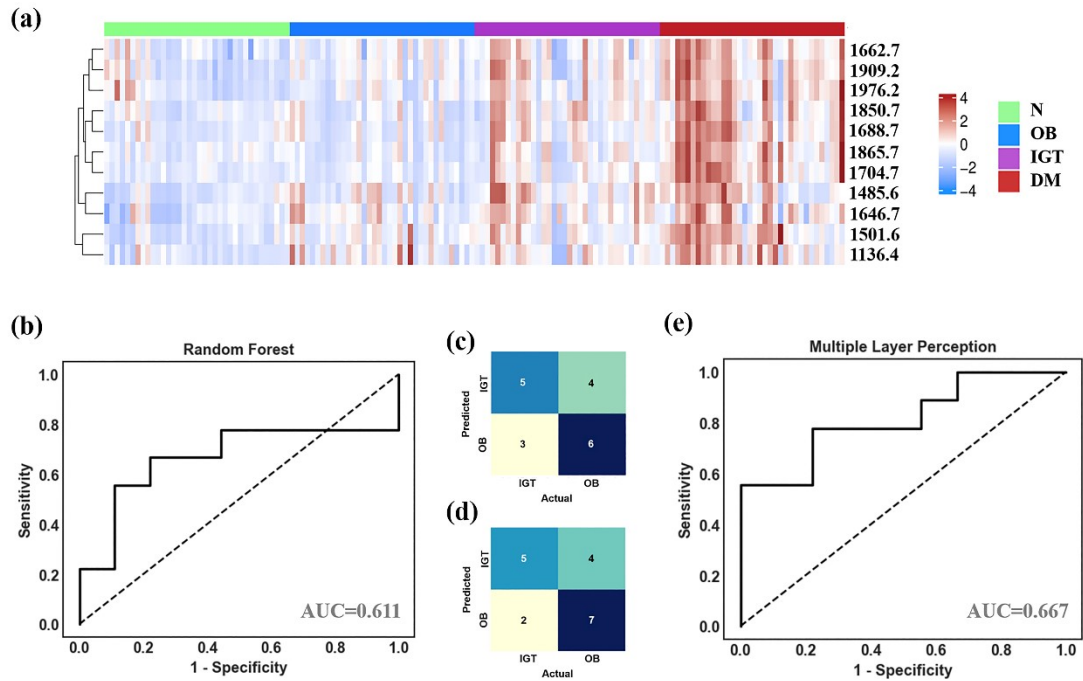

96  
 97

98 **Table S1.** List of identified 22 N-glycans released from OVA digests enriched by CS-  
 99 900-1C porous carbon.

| No. | m/z [M+ Na] <sup>+</sup> | Composition                          |
|-----|--------------------------|--------------------------------------|
| 1   | 933.4                    | Hex <sub>3</sub> HexNAc <sub>2</sub> |
| 2   | 1095.4                   | Hex <sub>4</sub> HexNAc <sub>2</sub> |
| 3   | 1136.5                   | Hex <sub>3</sub> HexNAc <sub>3</sub> |
| 4   | 1257.5                   | Hex <sub>5</sub> HexNAc <sub>2</sub> |
| 5   | 1298.6                   | Hex <sub>4</sub> HexNAc <sub>3</sub> |
| 6   | 1339.6                   | Hex <sub>3</sub> HexNAc <sub>4</sub> |
| 7   | 1419.6                   | Hex <sub>6</sub> HexNAc <sub>2</sub> |
| 8   | 1460.7                   | Hex <sub>5</sub> HexNAc <sub>3</sub> |
| 9   | 1501.7                   | Hex <sub>4</sub> HexNAc <sub>4</sub> |
| 10  | 1542.7                   | Hex <sub>3</sub> HexNAc <sub>5</sub> |
| 11  | 1581.7                   | Hex <sub>7</sub> HexNAc <sub>2</sub> |
| 12  | 1622.7                   | Hex <sub>6</sub> HexNAc <sub>3</sub> |
| 13  | 1663.8                   | Hex <sub>5</sub> HexNAc <sub>4</sub> |
| 14  | 1704.8                   | Hex <sub>4</sub> HexNAc <sub>5</sub> |
| 15  | 1745.8                   | Hex <sub>3</sub> HexNAc <sub>6</sub> |
| 16  | 1866.9                   | Hex <sub>5</sub> HexNAc <sub>5</sub> |
| 17  | 1907.0                   | Hex <sub>4</sub> HexNAc <sub>6</sub> |
| 18  | 1948.0                   | Hex <sub>3</sub> HexNAc <sub>7</sub> |
| 19  | 2028.0                   | Hex <sub>6</sub> HexNAc <sub>5</sub> |
| 20  | 2110.1                   | Hex <sub>4</sub> HexNAc <sub>7</sub> |
| 21  | 2151.1                   | Hex <sub>8</sub> HexNAc <sub>4</sub> |
| 22  | 2313.2                   | Hex <sub>3</sub> HexNAc <sub>8</sub> |

100

101

102 **Table S2.** Detailed information of the observed N-glycans from normal human serum  
 103 by enriching with CS-900-1C biomaterials (N-linked glycans were released by PNGase  
 104 F digestion, and glycan structures were searched from Glycoworkbench through the  
 105 Mol. wt of oligosaccharide. Part of the structures has been demonstrated.

| No | M/Z<br>([M+nNa] <sup>+</sup> ) | Composition | Structure (M)                                                                        |
|----|--------------------------------|-------------|--------------------------------------------------------------------------------------|
| 1  | 1079.4                         | H3N2F1      | 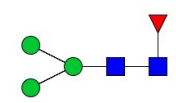   |
| 2  | 1095.4                         | H4N2        |    |
| 3  | 1136.4                         | H3N3        |    |
| 4  | 1257.4                         | H5N2        |  |
| 5  | 1281.5                         | H3N3F1      |  |
| 6  | 1298.5                         | H4N3        |  |
| 7  | 1338.5                         | H3N4        |  |
| 8  | 1419.5                         | H6N2        |  |
| 9  | 1443.5                         | H4N3F1      |  |
| 10 | 1460.5                         | H5N3        |  |

---

|    |        |        |                                                                                      |
|----|--------|--------|--------------------------------------------------------------------------------------|
| 11 | 1485.6 | H3N4F1 | 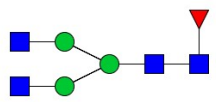   |
| 12 | 1501.6 | H4N4   |    |
| 13 | 1541.6 | H3N5   |    |
| 14 | 1581.6 | H7N2   |    |
| 15 | 1621.6 | H6N3   |    |
| 16 | 1629.6 | H3N4A1 |   |
| 17 | 1646.7 | H4N4F1 |  |
| 18 | 1662.7 | H5N4   |  |
| 19 | 1688.7 | H3N5F1 |  |
| 20 | 1704.7 | H4N5   |  |
| 21 | 1743.6 | H8N2   |  |
| 22 | 1791.7 | H3N5A1 |  |

---



|    |        |          |                                                                                      |
|----|--------|----------|--------------------------------------------------------------------------------------|
| 23 | 1808.7 | H5N4F1   | 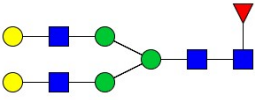   |
| 24 | 1814.2 | H4N4A1   |    |
| 25 | 1824.6 | H6N4     |    |
| 26 | 1850.7 | H4N5F1   |    |
| 27 | 1865.7 | H5N5     |    |
| 28 | 1891.2 | H3N6F1   |   |
| 29 | 1905.2 | H9N2     |  |
| 30 | 1909.2 | H4N6     |  |
| 31 | 1925.7 | H4N4F2X1 |  |
| 32 | 1954.5 | H4N4F1A1 |  |
| 33 | 1976.2 | H5N4A1   |  |
| 34 | 1996.5 | H4N5A1   |  |
| 35 | 2012.8 | H5N5F1   |  |

---

|    |        |          |                                                                                      |
|----|--------|----------|--------------------------------------------------------------------------------------|
| 36 | 2028.8 | H6N5     | 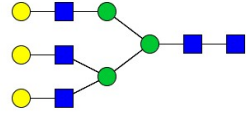   |
| 37 | 2056.2 | H6N3F1A1 |    |
| 38 | 2122.2 | H5N4F1A1 |    |
| 39 | 2173.8 | H6N5F1   |    |
| 40 | 2221.7 | H6N3A2   |    |
| 41 | 2245.7 | H5N4A2   |  |
| 42 | 2267.7 | H5N4F2A1 |  |
| 43 | 2282.7 | H5N5F1A1 |  |
| 44 | 2288.8 | H5N4A2   |  |
| 45 | 2294.7 | H7N4A1   |  |
| 46 | 2302.7 | H4N5A2   |  |

---

|    |        |          |  |
|----|--------|----------|--|
| 47 | 2305.7 | H5N5F3   |  |
| 48 | 2326.8 | H5N5F1A1 |  |
| 49 | 2340.8 | H6N5A1   |  |

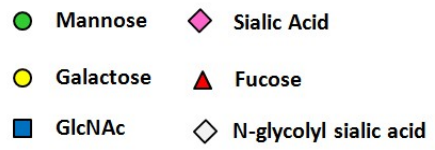

106

107

108 **Table S3.** Clinical characteristics of healthy controls (N) and patients with obesity  
 109 (OB), impaired glucose tolerance (IGT), and diabetes patients (DM).

|                           | All<br>(n=48)         | N<br>(n=12)        | OB<br>(n=12)         | IGT<br>(n=12) | DM<br>(n=12)        |
|---------------------------|-----------------------|--------------------|----------------------|---------------|---------------------|
| BMI (kg/m <sup>2</sup> )  | 34.6±8.8              | 23.1±1.9           | 36.9±5.4 ↑           | 38.4±6.5 ↑    | 40.0±7.7 ↑          |
| Sex, male (%)             | 24 (50%)              | 6 (50%)            | 6 (50%)              | 6 (50%)       | 6 (50%)             |
| Glucose (mmol/L)          | 6.2±1.9               | 5.0±0.4            | 5.1±0.4              | 5.6±0.5 ↑     | 8.9±1.9 ↑           |
| Insulin (mU/L)            | 38.9±22.8<br>(n=36)   | -                  | 32.0±15.9 ↑          | 44.1±14.4 ↑   | 40.6±33.3 ↑         |
| C-peptides (µg/L)         | 4.7±1.2 (n=35)        | -                  | 4.2±1.2              | 5.2±0.9 ↑     | 4.6±1.3 ↑<br>(n=11) |
| Glucose(2h)<br>(mmol/L)   | 9.9±4.2 (n=38)        | 5.4±1.0 (n=6)      | 6.4±1.4 (n=8) ↑      | 9.2±1.3 ↑     | 15.3±2.2 ↑          |
| Insulin (2h) (mU/L)       | 183.4±156.7<br>(n=32) | -                  | 144.7±138.3<br>(n=8) | 273.5±185.2   | 119.1±90.9          |
| C-peptides (2h)<br>(µg/L) | 12.6±5.0 (n=32)       | -                  | 11.4±5.5 (n=8)       | 15.9±4.5      | 10.0±3.5            |
| HbA1c (%)                 | 6.3±1.2 (n=41)        | 5.4±0.3 (n=6)      | 5.5±0.3 (n=11)       | 5.9±0.3 ↑     | 7.8±1.1 ↑           |
| IGF-1 (µg/L)              | 154.6±52.0<br>(n=36)  | -                  | 190.4±57.5           | 147.3±35.0    | 126.1±41.6          |
| ALT (U/L)                 | 61.5±61.1<br>(n=42)   | 14.3±10.0<br>(n=6) | 58.8±45.2 ↑          | 61.4±36.1 ↑   | 88.0±92.3 ↑         |
| AST (U/L)                 | 35.5±35.8<br>(n=42)   | 15.0±5.3<br>(n=6)  | 30.6±24.1            | 35.2±19.4 ↑   | 51.0±57.4 ↑         |
| Γ-GGT (U/L)               | 48.5±33.0<br>(n=42)   | 14.8±5.0<br>(n=6)  | 48.3±18.3 ↑          | 44.9±26.9     | 74.3±40.0 ↑         |
| Cholesterol<br>(mmol/L)   | 4.8±0.7 (n=36)        | -                  | 4.7±0.6              | 4.5±0.5       | 5.2±0.7             |
| TG (mmol/L)               | 1.9±1.3 (n=35)        | -                  | 1.5±1.0              | 2.1±1.2 ↑     | 2.0±1.7 ↑<br>(n=11) |
| HDL-c (mmol/L)            | 1.0±0.2 (n=36)        | -                  | 1.0±0.3              | 0.9±0.2       | 1.0±0.2             |
| LDL-c (mmol/L)            | 3.1±0.6 (n=33)        | -                  | 3.1±0.5 (n=10)       | 2.9±0.6       | 3.5±0.7 ↑<br>(n=11) |
| APOA-1 (g/L)              | 0.9±0.1 (n=33)        | -                  | 0.9±0.1 (n=10)       | 0.9±0.1       | 0.9±0.1<br>(n=11)   |
| APOB (g/L)                | 0.7±0.1 (n=33)        | -                  | 0.6±0.1 (n=10)       | 0.6±0.1       | 0.7±0.1<br>(n=11)   |
| nHDL-c (mmol)             | 3.8±0.7 (n=32)        | -                  | 3.7±0.7 (n=9)        | 3.6±0.5       | 4.1±0.7<br>(n=11)   |
| NEFA (mmol/L)             | 0.6±0.2 (n=36)        | -                  | 0.6±0.3              | 0.7±0.3 ↑     | 0.6±0.1             |
| HCY (µmol/L)              | 12.2±8.4 (n=28)       | -                  | 16.6±15.2 ↑          | 12.4±4.7      | 9.1±2.5             |

|                         |                       |                     | (n=7)                 | (n=10)              | (n=11)             |
|-------------------------|-----------------------|---------------------|-----------------------|---------------------|--------------------|
| TP (g/L)                | 70.8±4.2 (n=42)       | 69.2±5.0<br>(n=6)   | 70.3±3.2              | 71.3±2.8            | 71.5±5.7           |
| ALB (g/L)               | 43.4±2.7 (n=42)       | 45.8±2.2<br>(n=6)   | 43.3±2.7              | 42.7±2.5            | 42.8±2.6           |
| PA (mg/L)               | 255.1±49.5<br>(n=42)  | 262.3±50.8<br>(n=6) | 265.3±55.3            | 244.7±41.0          | 251.6±54.7         |
| CRE (μmol/L)            | 56.1±14.7<br>(n=39)   | 60.3±10.1<br>(n=3)  | 60.9±16.1             | 58.4±15.4           | 47.8±10.9          |
| UA (mmol/L)             | 0.5±0.1 (n=39)        | 0.4±0.1 (n=3)       | 0.5±0.1 †             | 0.5±0.2 †           | 0.5±0.1 †          |
| CysC (mg/L)             | 0.8±0.1 (n=31)        | 0.7±0.01<br>(n=3)   | 0.8±0.2 (n=7)         | 0.9±0.1<br>(n=10)   | 0.8±0.1<br>(n=11)  |
| FE (μmol/L)             | 17.1±5.6 (n=35)       | -                   | 16.1±5.9 (n=11)       | 17.0±5.3            | 18.2±5.9<br>(n=11) |
| GA(%)                   | 11.3±3.4 (n=35)       | -                   | 8.7±1.0               | 9.9±1.2             | 15.5±2.7<br>(n=11) |
| FIB (g/L)               | 3.2±1.0 (n=42)        | 2.3±0.6 (n=6)       | 3.4±0.9               | 3.4±0.7             | 3.4±1.2            |
| FERR (ng/mL)            | 347.5±367.7<br>(n=35) | -                   | 266.7±198.0<br>(n=11) | 331.6±279.0         | 459.0±527.0        |
| CER (g/L)               | 0.3±0.05 (n=28)       | -                   | 0.3±0.05 (n=6)        | 0.3±0.05<br>(n=10)  | 0.3±0.05           |
| β2-MG (mg/L)            | 1.7±0.4 (n=28)        | -                   | 1.7±0.3 (n=6)         | 1.9±0.5<br>(n=10) † | 1.6±0.3            |
| IgG4 (g/L)              | 0.7±0.6 (n=28)        | -                   | 0.4±0.2               | 0.8±0.5<br>(n=10)   | 0.7±0.7 (n=6)      |
| WBC (/10 <sup>9</sup> ) | 8.0±1.8 (n=42)        | 6.4±1.4 (n=6)       | 7.7±1.5               | 8.8±2.1             | 8.3±1.6            |

110 Data are reported as means±SD. *N*, normal; *OB*, obesity; *IGT*, impaired glucose tolerance; *DM*,  
111 diabetes mellitus; *HbA1c*, glycated hemoglobin; *IgF-1*, insulin like growth factor; *ALT*, Alamine  
112 aminotransferase; *AST*, aspartate amino transferase; *γ-GGT*, *γ*-glutamyltransferase; *TG*, triglyceride;  
113 *HDL-c*, high density lipoprotein cholesterol; *LDL-c*, low density lipoprotein cholesterol; *APO-A*,  
114 apolipoprotein-A; *APO-B*, apolipoprotein-B; *nHDL-c*, non high density lipoprotein cholesterol;  
115 *NEFA*, free fatty acids; *HCY*, Homocysteine; *TP*, total protein; *ALB*, albumin; *PA*, prealbumin; *CRE*,  
116 creatinine; *UA*, uric acid; *CysC*, serum cystatin; *FE*, serum Ferrium; *GA*, Glycosylated serum protein  
117 ratio; *FIB*, fibrinogen; *FERR*, Ferritin; *CER*, ceruloplasmin; *β2-MG*, β2-microglobulin; *IgG4*,  
118 immunoglobulin 4; *WBC*, White blood cell; black arrow indicated values higher than normal.
